# Supplementary material for: Real-world heart rate norms in the Health eHeart study
Source: Springer Nature journal article supplement (doi:10.1038/s41746-019-0134-9), 2019-06-25

## Supplemental materials

**Supplementary Table 1. HR-PPG and HRV distribution according to dataset**

| <b>Datasets</b>                                                | <b>Known resting HR dataset</b> | <b>Full HR Dataset</b> |
|----------------------------------------------------------------|---------------------------------|------------------------|
|                                                                | <b>N = 40,572</b>               | <b>N = 66,788</b>      |
| <b>HR-PPG description</b>                                      |                                 |                        |
| Number of HR-PPG measurements, n                               | 40,572                          | 3,110,988              |
| Number of HR-PPG measurements per user, per year, median (IQR) | 4.3 (9.2)                       | 60.1 (145.4)           |
| Average geometric mean HR-PPG $\pm$ SD                         | 81.8 $\pm$ 19.6                 | 79.0 $\pm$ 14.5        |
| 95% Percentile Interval for HR                                 | (52.5 – 132.1)                  | (54.5 – 110.8)         |
| Average HR on weekdays, bpm                                    | -                               | 79.1 $\pm$ 17.6        |
| Average HR on weekends, bpm                                    | -                               | 78.4 $\pm$ 17.1        |
| Average HR during spring, bpm                                  | -                               | 79.0 $\pm$ 17.4        |
| Average HR on summer, bpm                                      | -                               | 78.8 $\pm$ 16.6        |
| Average HR on fall, bpm                                        | -                               | 78.4 $\pm$ 16.5        |
| Average HR on winter, bpm                                      | -                               | 79.1 $\pm$ 16.7        |
| <b>HRV description</b>                                         |                                 |                        |
| Average HRV, bpm                                               | 13.4 $\pm$ 11.4                 | 15.8 $\pm$ 9.2         |
| Average HRV between 12 am and 6 am, bpm                        | -                               | 13.4 $\pm$ 10.4        |
| Average HRV between 6 am and 12 pm, bpm                        | -                               | 14.9 $\pm$ 10.6        |
| Average HRV between 12 pm and 6 pm, bpm                        | -                               | 14.1 $\pm$ 10.2        |
| Average HRV between 6 pm and 12 am, bpm                        | -                               | 12.5 $\pm$ 9.6         |
| Average HRV on weekdays, bpm                                   | -                               | 13.7 $\pm$ 10.7        |
| Average HRV on weekends, bpm                                   | -                               | 13.3 $\pm$ 10.4        |
| Average HRV during spring, bpm                                 | -                               | 14.1 $\pm$ 10.2        |

|                               |   |           |
|-------------------------------|---|-----------|
| Average HRV on summer,<br>bpm | - | 15.0±10.2 |
| Average HRV on fall, bpm      | - | 14.2±10.0 |
| Average HRV on winter,<br>bpm | - | 14.1±10.0 |

---

**Abbreviations:** HRV: Heart Rate Variability; HR-PPG; Heart rate measured using a smartphone photoplethysmography.

**Supplementary Table 2A. HR-PPG Percentiles according to age, in healthy**

**individuals**

| <b>AGE</b> | <b>95P</b> | <b>90P</b> | <b>75P</b> | <b>50P</b> | <b>25P</b> | <b>10P</b> | <b>5P</b> |
|------------|------------|------------|------------|------------|------------|------------|-----------|
| <b>18</b>  | 105.9      | 101.8      | 99.6       | 87.2       | 69.9       | 63.1       | 61.9      |
| <b>19</b>  | 102.2      | 96.0       | 89.6       | 80.8       | 71.5       | 65.2       | 57.9      |
| <b>20</b>  | 105.5      | 99.6       | 90.6       | 81.1       | 72.9       | 64.4       | 60.0      |
| <b>21</b>  | 103.9      | 99.3       | 91.5       | 80.9       | 72.6       | 64.8       | 60.2      |
| <b>22</b>  | 107.3      | 98.8       | 89.6       | 81.4       | 72.1       | 63.7       | 58.6      |
| <b>23</b>  | 107.6      | 100.1      | 90.2       | 81.0       | 71.9       | 64.6       | 59.4      |
| <b>24</b>  | 104.8      | 99.2       | 88.9       | 79.1       | 70.2       | 63.8       | 59.7      |
| <b>25</b>  | 107.4      | 99.6       | 90.0       | 80.7       | 72.2       | 63.6       | 60.5      |
| <b>26</b>  | 105.2      | 99.0       | 88.9       | 79.8       | 69.9       | 61.9       | 58.6      |
| <b>27</b>  | 103.3      | 97.4       | 88.7       | 79.5       | 70.0       | 62.2       | 57.8      |
| <b>28</b>  | 104.6      | 97.1       | 87.7       | 78.5       | 68.6       | 61.0       | 57.4      |
| <b>29</b>  | 105.4      | 99.4       | 88.4       | 77.8       | 69.2       | 61.4       | 57.4      |
| <b>30</b>  | 107.9      | 99.1       | 89.4       | 78.9       | 70.0       | 61.3       | 56.3      |
| <b>31</b>  | 105.6      | 99.2       | 88.8       | 78.8       | 68.9       | 61.4       | 58.4      |
| <b>32</b>  | 106.2      | 99.5       | 89.7       | 79.1       | 69.4       | 61.0       | 56.6      |
| <b>33</b>  | 105.1      | 98.9       | 88.4       | 77.8       | 69.6       | 62.2       | 58.0      |
| <b>34</b>  | 104.7      | 97.0       | 86.7       | 77.4       | 68.3       | 61.1       | 57.9      |
| <b>35</b>  | 106.2      | 99.8       | 88.7       | 78.5       | 68.7       | 61.0       | 56.6      |
| <b>36</b>  | 103.6      | 97.4       | 88.0       | 77.7       | 67.4       | 58.9       | 54.6      |
| <b>37</b>  | 105.6      | 98.5       | 87.9       | 77.2       | 68.2       | 61.4       | 57.1      |
| <b>38</b>  | 106.0      | 98.2       | 86.4       | 76.8       | 67.7       | 59.6       | 55.6      |
| <b>39</b>  | 107.0      | 98.9       | 87.0       | 78.3       | 69.5       | 61.7       | 57.1      |
| <b>40</b>  | 101.7      | 96.3       | 84.9       | 75.0       | 67.3       | 60.7       | 57.5      |
| <b>41</b>  | 101.7      | 95.3       | 86.3       | 77.2       | 68.0       | 61.5       | 56.4      |
| <b>42</b>  | 103.1      | 96.7       | 86.6       | 75.8       | 65.6       | 58.7       | 53.9      |
| <b>43</b>  | 97.4       | 93.2       | 83.6       | 74.2       | 65.8       | 57.5       | 54.8      |
| <b>44</b>  | 101.7      | 95.2       | 84.9       | 74.8       | 65.7       | 58.7       | 55.1      |
| <b>45</b>  | 99.9       | 94.1       | 85.8       | 75.8       | 66.8       | 59.2       | 55.4      |
| <b>46</b>  | 102.3      | 93.7       | 83.3       | 75.0       | 65.7       | 57.2       | 54.6      |
| <b>47</b>  | 99.8       | 92.7       | 83.0       | 73.1       | 65.2       | 58.0       | 54.5      |
| <b>48</b>  | 98.1       | 91.3       | 82.0       | 73.7       | 65.4       | 57.8       | 54.0      |
| <b>49</b>  | 101.3      | 94.6       | 83.3       | 74.1       | 65.4       | 58.3       | 54.2      |
| <b>50</b>  | 96.1       | 90.1       | 81.3       | 73.1       | 63.9       | 57.6       | 53.1      |

|           |       |      |      |      |      |      |      |
|-----------|-------|------|------|------|------|------|------|
| <b>51</b> | 101.4 | 92.2 | 81.2 | 73.8 | 65.9 | 59.7 | 55.7 |
| <b>52</b> | 97.0  | 92.4 | 83.4 | 73.0 | 64.8 | 58.6 | 55.3 |
| <b>53</b> | 96.1  | 88.6 | 80.3 | 72.2 | 64.8 | 58.7 | 54.2 |
| <b>54</b> | 96.6  | 91.1 | 81.8 | 73.3 | 64.7 | 58.8 | 55.6 |
| <b>55</b> | 97.8  | 91.4 | 82.0 | 72.5 | 63.8 | 56.7 | 52.9 |
| <b>56</b> | 97.4  | 90.0 | 82.3 | 73.0 | 64.9 | 57.5 | 54.4 |
| <b>57</b> | 94.6  | 88.5 | 80.4 | 72.7 | 64.7 | 58.9 | 56.0 |
| <b>58</b> | 96.1  | 90.7 | 82.4 | 73.1 | 64.1 | 58.0 | 56.1 |
| <b>59</b> | 98.7  | 90.4 | 80.9 | 71.6 | 62.7 | 58.4 | 55.5 |
| <b>60</b> | 99.2  | 90.9 | 80.0 | 71.2 | 63.2 | 57.8 | 52.3 |
| <b>61</b> | 94.4  | 88.0 | 78.9 | 72.4 | 64.8 | 60.0 | 57.4 |
| <b>62</b> | 100.8 | 91.1 | 81.5 | 72.5 | 64.1 | 56.8 | 53.3 |
| <b>63</b> | 96.1  | 89.3 | 81.5 | 72.3 | 64.8 | 58.5 | 55.0 |
| <b>64</b> | 97.1  | 86.9 | 79.3 | 70.5 | 63.1 | 57.9 | 55.5 |
| <b>65</b> | 93.6  | 87.5 | 81.7 | 73.3 | 66.0 | 61.0 | 56.3 |
| <b>66</b> | 95.7  | 89.1 | 81.8 | 73.1 | 63.3 | 57.0 | 54.1 |
| <b>67</b> | 86.5  | 83.2 | 77.7 | 71.3 | 65.8 | 59.3 | 56.4 |
| <b>68</b> | 90.2  | 86.3 | 81.1 | 72.3 | 64.7 | 60.7 | 57.8 |
| <b>69</b> | 99.7  | 93.8 | 79.9 | 71.1 | 64.2 | 59.9 | 56.2 |
| <b>70</b> | 91.9  | 87.9 | 81.3 | 72.6 | 62.2 | 58.7 | 57.8 |
| <b>71</b> | 94.9  | 91.1 | 80.1 | 74.0 | 64.6 | 56.9 | 54.8 |
| <b>72</b> | 96.4  | 92.8 | 79.0 | 71.5 | 63.1 | 59.6 | 56.6 |
| <b>73</b> | 88.9  | 86.1 | 79.1 | 72.7 | 64.3 | 60.9 | 60.0 |
| <b>74</b> | 92.3  | 88.2 | 79.9 | 73.4 | 67.0 | 59.5 | 57.6 |
| <b>75</b> | 94.3  | 87.6 | 83.5 | 76.7 | 68.5 | 61.5 | 57.9 |
| <b>76</b> | 91.1  | 85.9 | 77.3 | 72.4 | 65.1 | 56.5 | 51.9 |
| <b>77</b> | 90.4  | 86.8 | 81.6 | 77.2 | 75.0 | 66.3 | 58.5 |
| <b>78</b> | 88.6  | 85.6 | 75.3 | 70.1 | 66.1 | 57.9 | 53.6 |
| <b>79</b> | 86.7  | 86.1 | 84.3 | 81.2 | 78.4 | 76.7 | 76.1 |
| <b>80</b> | 86.3  | 81.9 | 74.5 | 72.4 | 71.7 | 68.9 | 67.3 |

**Supplementary Table 2B. HR-PPG Percentiles according to age, in healthy females**

| <b>Age</b> | <b>95p</b> | <b>90p</b> | <b>75p</b> | <b>50p</b> | <b>25p</b> | <b>10p</b> | <b>5p</b> |
|------------|------------|------------|------------|------------|------------|------------|-----------|
| <b>18</b>  | 97.5       | 96.0       | 91.5       | 87.5       | 80.3       | 69.9       | 66.4      |
| <b>19</b>  | 98.9       | 96.0       | 89.9       | 83.1       | 71.8       | 66.8       | 62.5      |
| <b>20</b>  | 103.8      | 99.0       | 91.0       | 81.8       | 75.2       | 66.4       | 60.6      |
| <b>21</b>  | 108.1      | 101.3      | 91.0       | 82.0       | 73.6       | 66.0       | 62.8      |
| <b>22</b>  | 104.6      | 99.4       | 89.6       | 81.9       | 73.4       | 66.9       | 59.9      |
| <b>23</b>  | 106.8      | 99.6       | 90.0       | 81.1       | 73.2       | 66.6       | 60.5      |
| <b>24</b>  | 103.2      | 98.2       | 89.5       | 80.4       | 71.1       | 64.4       | 60.9      |
| <b>25</b>  | 104.7      | 99.3       | 89.9       | 81.9       | 73.3       | 63.9       | 61.3      |
| <b>26</b>  | 102.5      | 96.9       | 88.6       | 79.8       | 71.5       | 63.0       | 60.0      |
| <b>27</b>  | 103.7      | 98.6       | 89.8       | 81.7       | 72.2       | 65.9       | 59.0      |
| <b>28</b>  | 105.3      | 98.8       | 88.5       | 79.2       | 70.6       | 62.0       | 58.2      |
| <b>29</b>  | 105.4      | 101.7      | 90.3       | 79.9       | 71.4       | 64.8       | 59.5      |
| <b>30</b>  | 108.2      | 102.0      | 91.3       | 80.1       | 70.5       | 62.1       | 58.5      |
| <b>31</b>  | 107.2      | 100.1      | 89.8       | 80.1       | 70.7       | 63.3       | 59.8      |
| <b>32</b>  | 106.2      | 100.0      | 90.3       | 80.8       | 71.1       | 63.6       | 58.5      |
| <b>33</b>  | 104.7      | 100.2      | 88.4       | 80.4       | 71.7       | 65.3       | 61.9      |
| <b>34</b>  | 104.2      | 97.3       | 87.7       | 79.9       | 70.5       | 62.8       | 59.5      |
| <b>35</b>  | 105.1      | 100.3      | 90.6       | 80.0       | 70.3       | 62.0       | 57.5      |
| <b>36</b>  | 102.9      | 98.7       | 90.5       | 80.6       | 71.7       | 64.2       | 55.8      |
| <b>37</b>  | 104.5      | 98.6       | 89.2       | 78.0       | 69.0       | 64.7       | 60.7      |
| <b>38</b>  | 103.3      | 97.2       | 86.0       | 77.7       | 69.8       | 62.7       | 59.1      |
| <b>39</b>  | 102.3      | 98.4       | 87.8       | 81.1       | 71.5       | 64.3       | 59.7      |
| <b>40</b>  | 102.7      | 97.4       | 87.5       | 78.1       | 69.3       | 64.1       | 60.7      |
| <b>41</b>  | 103.2      | 96.9       | 90.1       | 80.6       | 72.5       | 64.5       | 60.8      |
| <b>42</b>  | 105.0      | 99.6       | 90.5       | 79.3       | 67.8       | 60.1       | 55.4      |
| <b>43</b>  | 97.3       | 93.9       | 84.5       | 74.9       | 67.2       | 61.1       | 57.1      |
| <b>44</b>  | 102.4      | 96.3       | 88.1       | 78.5       | 68.3       | 61.7       | 59.2      |
| <b>45</b>  | 100.5      | 98.4       | 88.4       | 79.3       | 69.3       | 63.4       | 59.0      |
| <b>46</b>  | 99.8       | 93.1       | 84.7       | 77.9       | 70.0       | 62.2       | 57.2      |
| <b>47</b>  | 99.7       | 94.1       | 83.6       | 74.2       | 65.2       | 58.6       | 56.5      |
| <b>48</b>  | 96.2       | 90.5       | 83.0       | 75.2       | 68.5       | 62.2       | 57.9      |
| <b>49</b>  | 104.3      | 99.5       | 85.9       | 77.0       | 68.0       | 59.6       | 55.4      |

|           |       |      |      |      |      |      |      |
|-----------|-------|------|------|------|------|------|------|
| <b>50</b> | 100.5 | 92.3 | 83.2 | 75.1 | 67.3 | 59.3 | 55.2 |
| <b>51</b> | 97.7  | 89.9 | 81.1 | 74.8 | 66.8 | 61.2 | 57.5 |
| <b>52</b> | 102.5 | 96.3 | 85.7 | 75.8 | 68.0 | 61.8 | 59.2 |
| <b>53</b> | 96.2  | 89.6 | 82.4 | 74.8 | 68.7 | 62.5 | 58.3 |
| <b>54</b> | 96.3  | 87.1 | 81.4 | 73.4 | 67.3 | 59.3 | 56.7 |
| <b>55</b> | 105.4 | 97.7 | 83.7 | 74.1 | 66.1 | 57.2 | 55.2 |
| <b>56</b> | 97.9  | 90.0 | 82.5 | 74.4 | 66.4 | 58.6 | 56.6 |
| <b>57</b> | 92.4  | 87.6 | 78.8 | 71.6 | 64.3 | 60.1 | 57.8 |
| <b>58</b> | 99.9  | 92.2 | 82.2 | 74.2 | 65.8 | 59.9 | 55.9 |
| <b>59</b> | 96.8  | 89.7 | 81.0 | 74.3 | 66.0 | 62.1 | 60.2 |
| <b>60</b> | 100.3 | 97.1 | 83.4 | 74.1 | 66.2 | 61.3 | 58.1 |
| <b>61</b> | 97.0  | 91.4 | 80.1 | 73.4 | 67.6 | 61.6 | 59.7 |
| <b>62</b> | 99.5  | 90.2 | 81.1 | 74.6 | 68.8 | 58.4 | 56.1 |
| <b>63</b> | 100.5 | 91.4 | 83.3 | 73.6 | 65.6 | 59.8 | 58.1 |
| <b>64</b> | 109.0 | 96.9 | 82.7 | 73.7 | 65.9 | 61.9 | 59.6 |
| <b>65</b> | 94.4  | 88.0 | 83.0 | 76.3 | 68.0 | 62.8 | 59.1 |
| <b>66</b> | 103.2 | 93.0 | 82.0 | 74.4 | 65.6 | 58.8 | 57.4 |
| <b>67</b> | 85.4  | 84.1 | 79.1 | 72.3 | 65.9 | 57.6 | 56.6 |
| <b>68</b> | 88.2  | 85.9 | 82.0 | 75.1 | 69.0 | 64.7 | 62.2 |
| <b>69</b> | 94.6  | 92.2 | 79.9 | 73.0 | 68.4 | 63.8 | 63.3 |
| <b>70</b> | 92.2  | 89.6 | 81.9 | 77.4 | 65.2 | 61.1 | 59.0 |
| <b>71</b> | 91.5  | 86.9 | 82.1 | 76.1 | 72.0 | 64.5 | 62.8 |
| <b>72</b> | 95.2  | 92.8 | 88.9 | 76.2 | 72.0 | 68.3 | 66.3 |
| <b>73</b> | 89.5  | 87.5 | 85.5 | 75.5 | 69.0 | 65.0 | 64.2 |
| <b>74</b> | 91.7  | 87.5 | 77.0 | 73.5 | 68.4 | 66.7 | 66.1 |
| <b>75</b> | 94.3  | 92.2 | 84.1 | 76.6 | 70.0 | 66.7 | 61.6 |
| <b>76</b> | 94.3  | 89.6 | 77.7 | 69.6 | 64.8 | 61.7 | 58.5 |
| <b>77</b> | 93.6  | 91.4 | 85.2 | 81.2 | 76.4 | 74.6 | 74.1 |
| <b>78</b> | 82.5  | 79.9 | 74.6 | 73.4 | 66.9 | 64.3 | 63.9 |
| <b>79</b> | 81.9  | 77.3 | 71.8 | 68.5 | 62.1 | 58.0 | 54.0 |
| <b>80</b> | 72.8  | 72.8 | 72.8 | 72.8 | 72.8 | 72.8 | 72.8 |

**Supplementary Table 2C. HR-PPG Percentiles according to age, in healthy males**

| <b>Age</b> | <b>95p</b> | <b>90p</b> | <b>75p</b> | <b>50p</b> | <b>25p</b> | <b>10p</b> | <b>5p</b> |
|------------|------------|------------|------------|------------|------------|------------|-----------|
| <b>18</b>  | 102.4      | 96.4       | 88.6       | 76.9       | 68.0       | 61.2       | 57.8      |
| <b>19</b>  | 94.9       | 93.3       | 86.9       | 75.3       | 67.5       | 59.3       | 57.2      |
| <b>20</b>  | 96.1       | 93.1       | 87.0       | 76.5       | 67.9       | 61.1       | 58.0      |
| <b>21</b>  | 99.9       | 95.8       | 88.9       | 75.6       | 67.9       | 59.4       | 55.5      |
| <b>22</b>  | 98.2       | 93.0       | 82.8       | 75.3       | 66.9       | 60.7       | 56.7      |
| <b>23</b>  | 106.9      | 98.3       | 86.4       | 76.5       | 67.5       | 58.9       | 56.4      |
| <b>24</b>  | 103.7      | 98.8       | 83.9       | 73.0       | 65.7       | 60.3       | 56.5      |
| <b>25</b>  | 104.6      | 97.2       | 87.6       | 77.5       | 68.2       | 62.1       | 58.6      |
| <b>26</b>  | 103.6      | 92.4       | 85.1       | 75.7       | 65.3       | 59.6       | 57.5      |
| <b>27</b>  | 96.0       | 91.5       | 81.3       | 71.7       | 64.6       | 58.9       | 56.1      |
| <b>28</b>  | 99.2       | 94.6       | 82.6       | 73.9       | 65.7       | 58.5       | 55.5      |
| <b>29</b>  | 98.4       | 94.1       | 84.2       | 73.6       | 65.2       | 57.2       | 55.4      |
| <b>30</b>  | 98.9       | 95.3       | 86.4       | 74.6       | 66.0       | 56.9       | 51.8      |
| <b>31</b>  | 101.4      | 96.0       | 86.1       | 75.0       | 65.3       | 60.5       | 57.2      |
| <b>32</b>  | 105.9      | 95.7       | 85.6       | 74.4       | 66.1       | 57.5       | 55.0      |
| <b>33</b>  | 100.5      | 95.0       | 84.8       | 73.9       | 65.9       | 58.0       | 53.8      |
| <b>34</b>  | 98.3       | 91.3       | 83.6       | 74.3       | 65.1       | 58.8       | 56.3      |
| <b>35</b>  | 104.2      | 95.1       | 83.9       | 74.6       | 64.9       | 58.6       | 54.3      |
| <b>36</b>  | 98.2       | 91.6       | 83.5       | 72.9       | 62.6       | 57.1       | 54.4      |
| <b>37</b>  | 102.5      | 95.8       | 83.5       | 74.1       | 65.9       | 57.9       | 54.9      |
| <b>38</b>  | 106.0      | 97.3       | 83.8       | 72.4       | 63.0       | 55.7       | 54.1      |
| <b>39</b>  | 109.5      | 98.6       | 84.6       | 74.5       | 65.2       | 57.9       | 55.5      |
| <b>40</b>  | 97.9       | 92.0       | 80.9       | 71.7       | 64.4       | 58.3       | 54.6      |
| <b>41</b>  | 95.2       | 91.3       | 82.9       | 72.9       | 65.2       | 56.9       | 53.4      |
| <b>42</b>  | 100.4      | 95.1       | 81.5       | 72.6       | 64.6       | 57.1       | 52.5      |
| <b>43</b>  | 94.8       | 88.6       | 81.4       | 71.4       | 63.2       | 55.6       | 53.8      |
| <b>44</b>  | 98.5       | 90.8       | 80.2       | 71.6       | 63.1       | 56.2       | 52.0      |
| <b>45</b>  | 95.7       | 91.3       | 81.4       | 72.5       | 62.9       | 56.5       | 53.2      |
| <b>46</b>  | 101.8      | 91.6       | 80.7       | 71.9       | 62.6       | 55.1       | 52.0      |
| <b>47</b>  | 99.3       | 91.9       | 82.3       | 71.0       | 62.8       | 55.8       | 51.1      |
| <b>48</b>  | 97.3       | 91.3       | 80.4       | 70.7       | 62.6       | 54.3       | 51.4      |
| <b>49</b>  | 96.5       | 90.8       | 80.1       | 71.1       | 62.9       | 55.7       | 52.9      |
| <b>50</b>  | 90.1       | 84.1       | 78.5       | 69.5       | 62.0       | 55.0       | 51.6      |
| <b>51</b>  | 102.1      | 92.6       | 79.6       | 72.2       | 64.4       | 58.3       | 52.6      |
| <b>52</b>  | 90.7       | 86.8       | 80.2       | 68.3       | 61.9       | 56.3       | 53.9      |
| <b>53</b>  | 90.6       | 85.0       | 77.1       | 68.2       | 62.1       | 56.3       | 52.8      |

|           |       |      |      |      |      |      |      |
|-----------|-------|------|------|------|------|------|------|
| <b>54</b> | 94.5  | 88.0 | 78.8 | 70.9 | 62.6 | 56.6 | 54.1 |
| <b>55</b> | 91.6  | 88.3 | 79.6 | 69.1 | 60.8 | 53.3 | 50.9 |
| <b>56</b> | 97.3  | 90.9 | 80.8 | 70.9 | 62.9 | 55.3 | 51.1 |
| <b>57</b> | 94.1  | 87.6 | 79.7 | 72.5 | 63.2 | 56.8 | 55.7 |
| <b>58</b> | 94.7  | 87.2 | 80.1 | 71.0 | 61.8 | 57.2 | 54.8 |
| <b>59</b> | 96.0  | 88.1 | 78.0 | 69.6 | 60.6 | 56.2 | 54.5 |
| <b>60</b> | 94.4  | 87.0 | 77.1 | 69.0 | 61.3 | 55.7 | 50.4 |
| <b>61</b> | 87.3  | 83.8 | 77.1 | 69.0 | 61.9 | 58.7 | 55.1 |
| <b>62</b> | 97.3  | 92.8 | 76.2 | 67.1 | 62.4 | 53.2 | 50.5 |
| <b>63</b> | 87.0  | 82.8 | 77.9 | 68.9 | 62.6 | 54.9 | 53.2 |
| <b>64</b> | 80.9  | 79.8 | 72.3 | 65.5 | 60.2 | 56.0 | 54.5 |
| <b>65</b> | 91.5  | 85.2 | 78.5 | 69.2 | 63.7 | 56.2 | 53.8 |
| <b>66</b> | 88.8  | 85.1 | 78.2 | 69.4 | 61.9 | 55.7 | 49.9 |
| <b>67</b> | 81.5  | 79.2 | 76.1 | 69.1 | 65.0 | 59.4 | 55.4 |
| <b>68</b> | 87.8  | 85.6 | 77.5 | 69.7 | 61.9 | 58.2 | 54.8 |
| <b>69</b> | 102.5 | 88.5 | 72.3 | 68.4 | 64.2 | 58.5 | 55.1 |
| <b>70</b> | 90.3  | 86.8 | 79.1 | 69.6 | 61.4 | 58.2 | 56.3 |
| <b>71</b> | 92.7  | 90.2 | 77.6 | 69.0 | 62.1 | 55.3 | 54.9 |
| <b>72</b> | 79.2  | 77.8 | 73.1 | 64.2 | 61.2 | 56.8 | 55.3 |
| <b>73</b> | 88.1  | 84.4 | 74.7 | 68.2 | 61.5 | 60.0 | 55.5 |
| <b>74</b> | 85.2  | 82.4 | 76.5 | 69.6 | 58.8 | 55.9 | 54.4 |
| <b>75</b> | 92.0  | 88.0 | 83.3 | 75.4 | 68.6 | 67.6 | 64.9 |
| <b>76</b> | 84.0  | 80.3 | 74.0 | 68.4 | 58.4 | 50.7 | 50.2 |
| <b>77</b> | 83.9  | 82.7 | 79.1 | 76.9 | 71.9 | 63.1 | 60.2 |
| <b>78</b> | 92.3  | 89.3 | 70.1 | 67.2 | 58.8 | 52.9 | 50.2 |
| <b>79</b> | 86.7  | 86.1 | 84.4 | 81.4 | 78.5 | 76.7 | 76.1 |
| <b>80</b> | 88.8  | 87.0 | 81.5 | 72.4 | 72.4 | 72.4 | 72.4 |



**Supplementary Table 3. HR-PPG Percentiles according to average daily step count strata**

| <b>DAILY STEP COUNT</b> | <b>95P</b> | <b>90P</b> | <b>75P</b> | <b>50P</b>  | <b>25P</b> | <b>10P</b> | <b>5P</b> |
|-------------------------|------------|------------|------------|-------------|------------|------------|-----------|
| <b>100 - 2000</b>       | 104.5      | 97.5       | 88.2       | <b>79.3</b> | 70.5       | 63.2       | 59.5      |
| <b>2001 - 4000</b>      | 103.3      | 96.4       | 87.8       | <b>78.9</b> | 70.5       | 63.1       | 58.9      |
| <b>4001 - 6000</b>      | 101.3      | 95.5       | 86.3       | <b>77.8</b> | 69.4       | 62.1       | 57.5      |
| <b>6001 - 8000</b>      | 105.5      | 97.2       | 86.8       | <b>77.1</b> | 68.7       | 61.6       | 58.0      |
| <b>8001 - 10000</b>     | 106.3      | 98.1       | 87.0       | <b>76.0</b> | 66.4       | 59.9       | 56.7      |
| <b>10001 - 12000</b>    | 107.4      | 97.8       | 88.4       | <b>76.9</b> | 67.9       | 60.0       | 57.0      |
| <b>12001 - 14000</b>    | 114.7      | 97.3       | 87.6       | <b>78.9</b> | 68.3       | 59.6       | 57.5      |
| <b>14001 - 16000</b>    | 100.8      | 97.8       | 86.6       | <b>76.4</b> | 70.3       | 63.7       | 62.0      |
| <b>16001 - 18000</b>    | 101.5      | 98.3       | 80.8       | <b>75.1</b> | 68.7       | 58.6       | 55.8      |
| <b>18001 - 20000</b>    | 104.3      | 101.9      | 85.2       | <b>76.5</b> | 67.6       | 63.7       | 61.3      |

**Supplementary Table 4. Baseline Characteristics for the known resting HR dataset and the full HR dataset restricted to those with no reported medical conditions.**

| Baseline characteristics                             | Known resting HR dataset<br>a,b<br><br>N=3,040 | No reported medical<br>conditions <sup>a,b</sup><br><br>n, (%)<br><br>n=25,408 |
|------------------------------------------------------|------------------------------------------------|--------------------------------------------------------------------------------|
| Age, mean±SD, yrs                                    | 41.6±13.0                                      | 37.7±13.0                                                                      |
| Number of HR-PPG values recorded                     | 14,364                                         | 1,103,570                                                                      |
| Number of HR-PPG measurements per user, median (IQR) | 3.0 (1.0 – 5.0)                                | 17.0 (6.0 – 45.0)                                                              |
| Geometric HR-PPG, mean±SD, bpm                       | 81.8±19.6                                      | 77.6±14.6                                                                      |
| <b>Demographics</b>                                  | <b>N=2,412</b>                                 | <b>N=18,858</b>                                                                |
| Females                                              | 1,120 (46.4)                                   | 9,476 (50.2)                                                                   |
| Males                                                | 1,292 (53.6)                                   | 9,382 (49.8)                                                                   |
| <b>Race or ethnic group</b>                          | <b>N=2,412</b>                                 | <b>N=18,727</b>                                                                |
| Non-Hispanic White                                   | 1,742 (72.2)                                   | 14,280 (76.3)                                                                  |
| Black or African American                            | 56 (2.3)                                       | 314 (1.7)                                                                      |

|                                                   |              |                |
|---------------------------------------------------|--------------|----------------|
| Hispanic, Latino or Spanish<br>origin or ancestry | 267 (11.1)   | 2,001 (10.7)   |
| Asian                                             | 183 (7.6)    | 1,160 (6.2)    |
| Multi-ethnic                                      | 109 (4.5)    | 526 (2.8)      |
| Other                                             | 55 (2.3)     | 446 (2.4)      |
| <b>Anthropometric data</b>                        | <b>N=480</b> | <b>N=2,175</b> |
| Height, mean±SD, m                                | 1.73±0.10    | 1.73±0.10      |
| Weight, mean±SD, kg                               | 80.0±18.2    | 77.9 ±17.8     |
| BMI, mean±SD, kg/m <sup>2</sup>                   | 26.6±5.4     | 26.1±5.3       |

**Abbreviations:** BMI: Body Mass Index; HR: Heart rate; m: meters; PPG:

Photoplethysmography; SD: Standard deviation.

<sup>a</sup> Participants contributed measurements to both datasets.

<sup>b</sup> The distribution of all variables shared between the “known resting HR”, the “No reported medical conditions dataset” are significantly different ( $p < 0.0005$ ), except the BMI ( $p = 0.04$ ), the “height” ( $p = 0.22$ ) and the weight ( $p = 0.01$ ).

**Supplementary Table 5. Univariable Predictors of Mean Heart Rate**

| Variable                                             | Coefficient | 95% CI                  | p-value |
|------------------------------------------------------|-------------|-------------------------|---------|
| Age (10-year increments)                             | -1.75e02    | -1.80e02 – -<br>1.70e02 | <0.0005 |
| Gender, for females                                  | 4.44        | 4.15 – 4.72             | <0.0005 |
| Height, per cm                                       | -0.23       | -0.269 - -0.19          | <0.0005 |
| Weight, per kg                                       | 0.006       | -0.01 – 0.03            | 0.54    |
| BMI, per kg/m <sup>2</sup>                           | 0.25        | 0.25 – 0.26             | <0.0005 |
| Number of steps (1000-step<br>increment)             | -0.21       | -0.42 – 0.01            | 0.05    |
| <b>Race or ethnic group</b>                          |             |                         | <0.0005 |
| Non-Hispanic White                                   | Ref         | -                       | -       |
| Black or African<br>American                         | 2.76        | -0.60-6.12              | 0.11    |
| Hispanic, Latino or<br>Spanish origin or<br>ancestry | 1.08        | -0.51 – 2.67            | 0.18    |
| Asian                                                | 5.22        | 3.12 – 7.32             | <0.0005 |
| Multi-ethnic                                         | 2.66        | 0.07 – 5.24             | 0.04    |
| Other/prefer not to<br>disclose                      | 0.44        | -0.51 – 2.67            | 0.18    |

|                                                     |      |           |         |
|-----------------------------------------------------|------|-----------|---------|
| Number of medical conditions, per medical condition | 0.65 | 0.33-0.96 | <0.0005 |
|-----------------------------------------------------|------|-----------|---------|

condition

**Abbreviations:** cm: centimeters; kg: kilogram;

**Supplementary Table 6. Beta-blockers and beta-agonists multivariable regression models**

| <b>Model 1.</b> Multivariable regression describing the relationship between age, gender, beta-blockers use, hypertension and heart rate* |             |               |         |
|-------------------------------------------------------------------------------------------------------------------------------------------|-------------|---------------|---------|
| Variable                                                                                                                                  | Coefficient | 95% CI        | p-value |
| Gender, for females                                                                                                                       | 4.17        | 3.85 – 4.47   | <0.0005 |
| Interaction between Beta-blockers use & hypertension                                                                                      | -4.50       | -5.73 - -3.28 | <0.0005 |
| Beta-blockers use                                                                                                                         | 2.66        | 1.75 – 3.58   | <0.0005 |
| Age, per 10y                                                                                                                              | -1.81       | -1.93 – -1.70 | <0.0005 |
| Hypertension                                                                                                                              | 3.76        | 3.36 – 4.16   | <0.0005 |

  

| <b>Model 2.</b> Multivariable linear regression describing the relationship between age, gender, beta-blockers use, hypercholesterolemia and heart rate * |             |               |         |
|-----------------------------------------------------------------------------------------------------------------------------------------------------------|-------------|---------------|---------|
| Variable                                                                                                                                                  | Coefficient | 95% CI        | p-value |
| Gender, for females                                                                                                                                       | 4.11        | 3.80 – 4.42   | <0.0005 |
| Interaction between Beta-blockers use & hypercholesterolemia                                                                                              | -2.43       | -3.64 – -1.23 | <0.0005 |
| Age, per 10y                                                                                                                                              | -1.79       | -1.90 – -1.67 | <0.0005 |
| Hypercholesterolemia                                                                                                                                      | 2.70        | 2.33 – 3.08   | <0.0005 |
| Beta-blockers use                                                                                                                                         | -2.43       | -3.64 – -1.23 | <0.0005 |

  

| <b>Model 3.</b> Multivariable linear regression describing the relationship between age, gender, beta-blockers use, diabetes and heart rate* |             |               |         |
|----------------------------------------------------------------------------------------------------------------------------------------------|-------------|---------------|---------|
| Variable                                                                                                                                     | Coefficient | 95% CI        | p-value |
| Gender, for females                                                                                                                          | 4.05        | 3.75 – 4.36   | <0.0005 |
| Interaction between Beta-blockers use & diabetes                                                                                             | -4.21       | -6.12 – -2.31 | <0.0005 |

|                   |       |               |         |
|-------------------|-------|---------------|---------|
| Beta-blockers use | 1.32  | 0.68 – 1.96   | <0.0005 |
| Age, per 10y      | -1.69 | -1.80 – -1.58 | <0.0005 |
| Diabetes          | 7.02  | 6.28 – 7.77   | <0.0005 |

**Model 4.** Multivariable linear regression describing the relationship between age, gender, beta-blockers use, CAD and heart rate\*

| Variable                                     | Coefficient | 95% CI        | p-value |
|----------------------------------------------|-------------|---------------|---------|
| Interaction between Beta-Gender, for females | -4.71       | -6.31 - -3.11 | <0.0005 |
| CAD                                          | 2.97        | 2.14 -3.80    | <0.0005 |
| Beta-blockers use                            | 1.74        | 1.06 – 2.43   | <0.0005 |
| Age, per 10y                                 | -159        | -1.70 - -1.48 | <0.0005 |

**Model 5.** Multivariable linear regression describing the relationship between age, gender, beta-blockers use, prior myocardial infarction and heart rate \*

| Variable                                         | Coefficient | 95% CI        | p-value |
|--------------------------------------------------|-------------|---------------|---------|
| Gender, for females                              | 4.04        | 3.73 – 4.35   | <0.0005 |
| Interaction between beta-blockers use & prior MI | -4.22       | -6.35 - -2.10 | <0.0005 |
| Prior MI                                         | 3.08        | 1.81 – 4.36   | <0.0005 |
| Beta-blockers use                                | 1.41        | 0.77 – 2.06   | <0.0005 |
| Age, per 10y                                     | -1.57       | -1.68 - -1.46 | <0.0005 |

**Model 6.** Multivariable linear regression describing the relationship between age, gender, beta-blockers use, presence of arrhythmia and heart rate \*

| Variable | Coefficient | 95% CI | p-value |
|----------|-------------|--------|---------|
|----------|-------------|--------|---------|

|                                                           |       |              |         |
|-----------------------------------------------------------|-------|--------------|---------|
| Gender, for females                                       | 3.80  | 3.49 – 4.11  | <0.0005 |
| Interaction between<br>beta-blockers use &<br>arrhythmias | -0.53 | -1.82 – 0.76 | 0.42    |
| Arrhythmias                                               | 2.16  | 1.66 – 2.65  | <0.0005 |
| Beta-blockers use                                         | 0.89  | 0.15 – 1.63  | 0.02    |
| Age, per 10y                                              | -1.53 | -1.64 – 1.42 | <0.0005 |

**Model 7.** Multivariable linear regression describing the relationship between age, gender, beta-blockers use, peripheral vascular disease and heart rate \*

| Variable                                   | Coefficient | 95% CI        | p-value |
|--------------------------------------------|-------------|---------------|---------|
| Gender, for females                        | 4.04        | 3.73 – 4.35   | <0.0005 |
| PVD                                        | 3.25        | 1.64 – 4.87   | <0.0005 |
| Beta-blockers use                          | 1.21        | 0.60 – 1.83   | <0.0005 |
| Age, per 10y                               | -1.56       | -1.67 - -1.45 | <0.0005 |
| Interaction between<br>Beta-blockers use & | -2.50       | -5.97 – 0.97  | 0.16    |

**Model 8.** Multivariable linear regression describing the relationship between age, gender, beta-blockers use, stroke and heart rate \*

| Variable            | Coefficient | 95% CI      | p-value |
|---------------------|-------------|-------------|---------|
| Gender, for females | 4.03        | 3.71 – 4.33 | <0.0005 |
| Stroke              | 2.32        | 1.15 – 3.50 | <0.0005 |



|                                            |       |               |         |
|--------------------------------------------|-------|---------------|---------|
| Beta-blockers use                          | 1.02  | 0.40 – 1.64   | <0.0005 |
| Age, per 10y                               | -1.57 | -1.68 - -1.46 | <0.0005 |
| Interaction between<br>beta-blockers use & | 2.00  | -0.77 – 4.78  | 0.16    |

**Model 9.** Multivariable linear regression describing the relationship between age, gender, beta-blockers use, CHF and heart rate \*

| Variable                                          | Coefficient | 95% CI        | p-value |
|---------------------------------------------------|-------------|---------------|---------|
| CHF                                               | 4.71        | 2.85 – 6.57   | <0.0005 |
| Gender, for females                               | 4.03        | -3.72 – 4.34  | <0.0005 |
| Beta-blockers use                                 | 1.19        | 0.56 – 1.82   | <0.0005 |
| Age, per 10y                                      | -1.56       | -1.67 – -1.45 | <0.0005 |
| Interaction between<br>Beta-blockers use &<br>CHF | 1.19        | 0.56 – 1.82   | <0.0005 |

**Model 10.** Multivariable linear regression describing the relationship between age, gender, beta-agonists use, asthma and heart rate \*

| Variable            | Coefficient | 95% CI        | p-value |
|---------------------|-------------|---------------|---------|
| Gender, for females | 3.94        | 3.64 – 4.25   | <0.0005 |
| Age, per 10y        | -1.49       | -1.59 – -1.38 | <0.0005 |
| Asthma              | 2.45        | 1.93 – 3.00   | <0.0005 |
| Beta-agonists use   | 4.20        | 0.66 – 7.73   | <0.0005 |

Interaction between  
Beta-agonists use &  
asthma

|       |              |         |
|-------|--------------|---------|
| -2.48 | -7.91 – 2.94 | <0.0005 |
|-------|--------------|---------|

**Model 11.** Multivariable linear regression describing the relationship between age, gender, beta-agonists use, COPD and heart rate \*

| Variable                                           | Coefficient | 95% CI        | p-value |
|----------------------------------------------------|-------------|---------------|---------|
| COPD                                               | 4.52        | 3.54 – 5.50   | <0.0005 |
| Gender, for females                                | 4.00        | 3.69 – 4.31   | <0.0005 |
| Beta-agonists use                                  | 3.35        | 0.61 – 6.09   | <0.0005 |
| Interaction between<br>beta-agonists use &<br>COPD | 10.09       | -2.38 – 22.56 | <0.0005 |
| Age, per 10y                                       | -1.54       | -1.65 – 14.3  | <0.0005 |

**Abbreviations:** 10y: 10-year increments; CAD: Coronary artery disease; CHF: Congestive heart failure; COPD: Chronic obstructive pulmonary disease; CCB: Calcium channel blockers; HR: Heart rate; IQR: Interquartile range; MI: Myocardial Infarction; PVD: Peripheral Vascular Disease.

**Supplementary Figure 1. Photoplethysmography waveform as measured by the Azumio Instant HR app.**

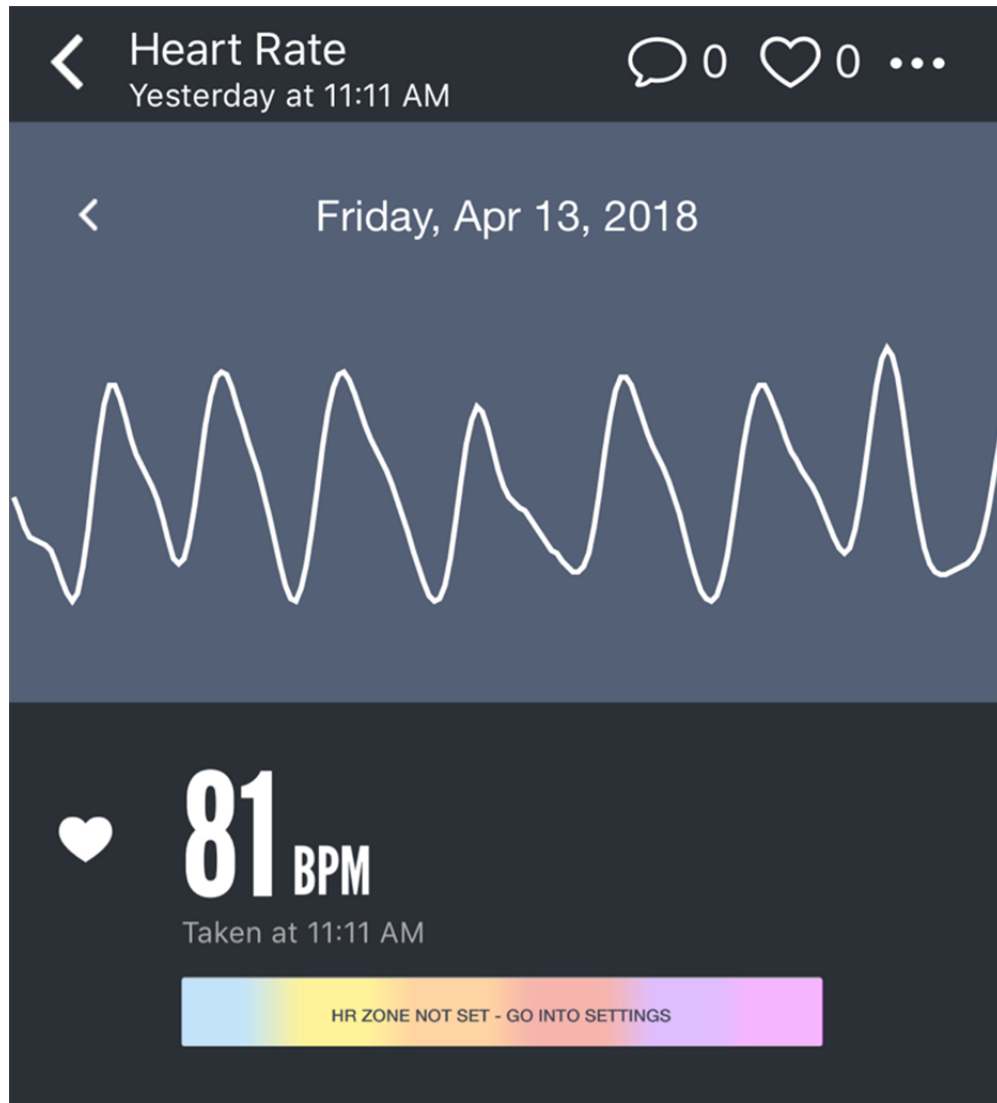

## Supplementary Figure 2. Simultaneous HR-ECG recording and HR-PPG recording

### A. Normal Sinus Rhythm

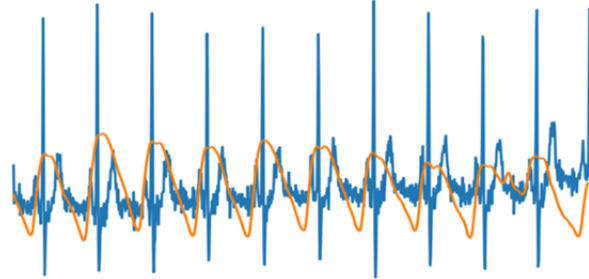

### B. Normal Sinus Rhythm with Premature Ventricular Contractions

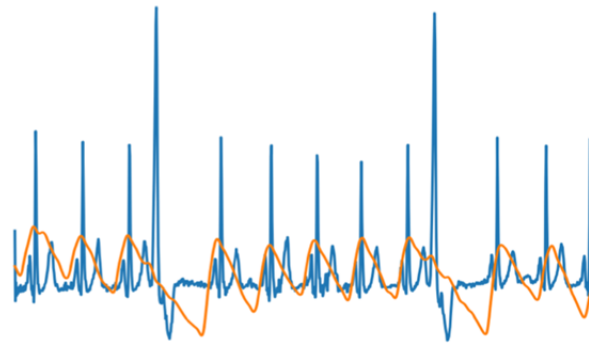

### C. Atrial Fibrillation

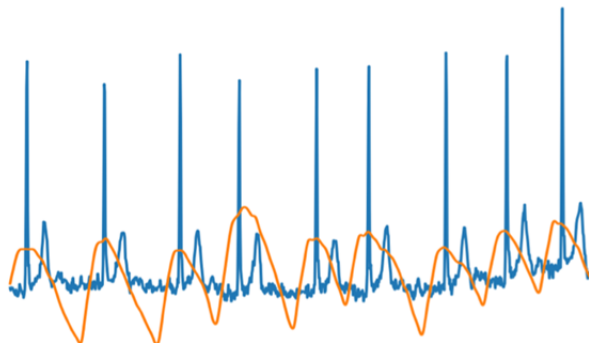

Blue waveform: HR-ECG recording; Orange waveform: HR-PPG recording.

### Supplementary Figure 3

**A. Bland-Altman plot of RR intervals as measured by ECG and PPG, in milliseconds**

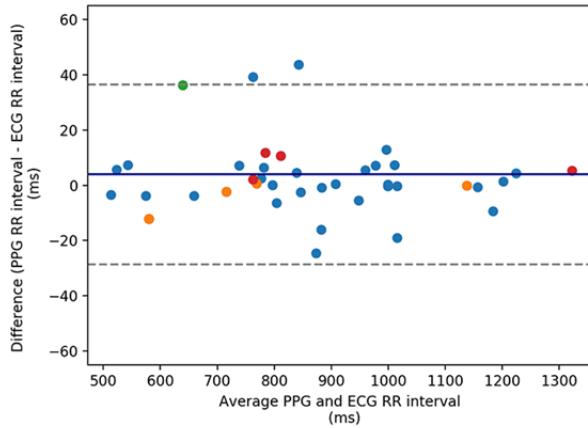

**B. Bland-Altman plot of average HR as measured by ECG and PPG, in beats per minute**

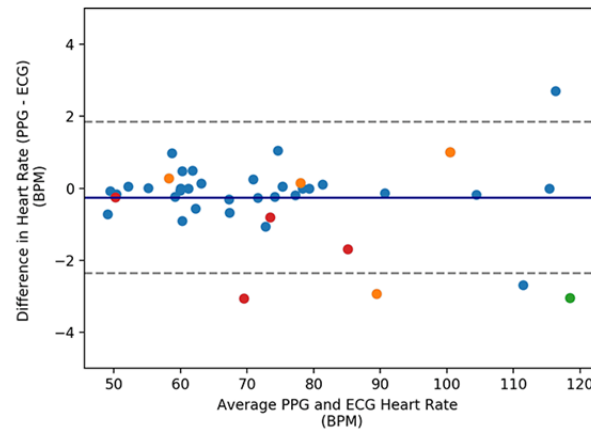

**b.**

**Legend:** Dashed lines: 95% confidence interval; Full blue line: mean values of the difference between PPG & ECG; Orange: Atrial Fibrillation; Red: Frequent PVCs; Green: Atrial Flutter; Blue dots: Normal sinus rhythm.

## Supplementary Figure 4. Creation of our different datasets

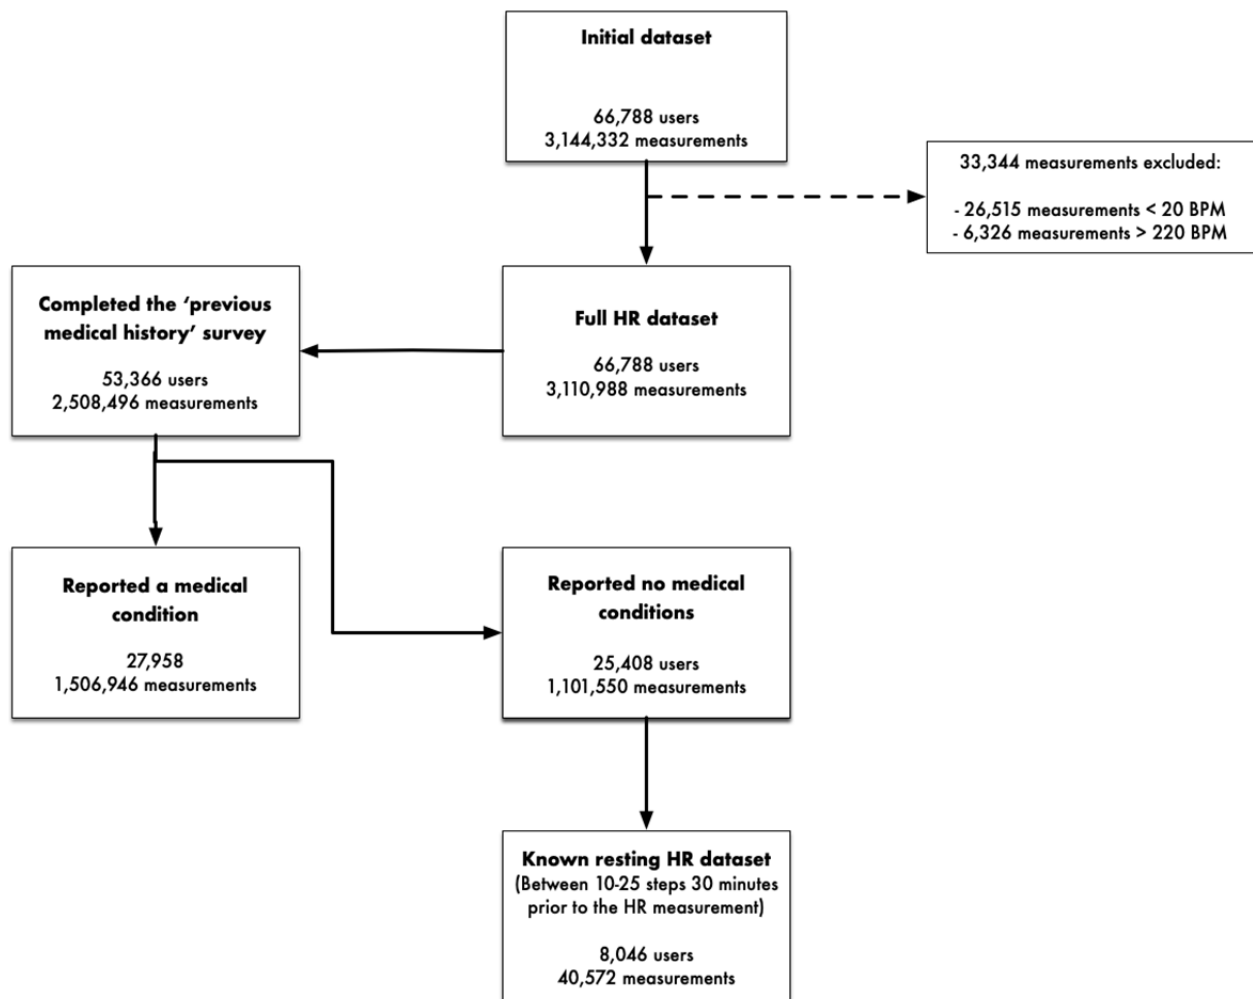

**Supplementary Figure 5. Distribution of heart rate in our full heart rate dataset and in our known resting heart rate dataset**

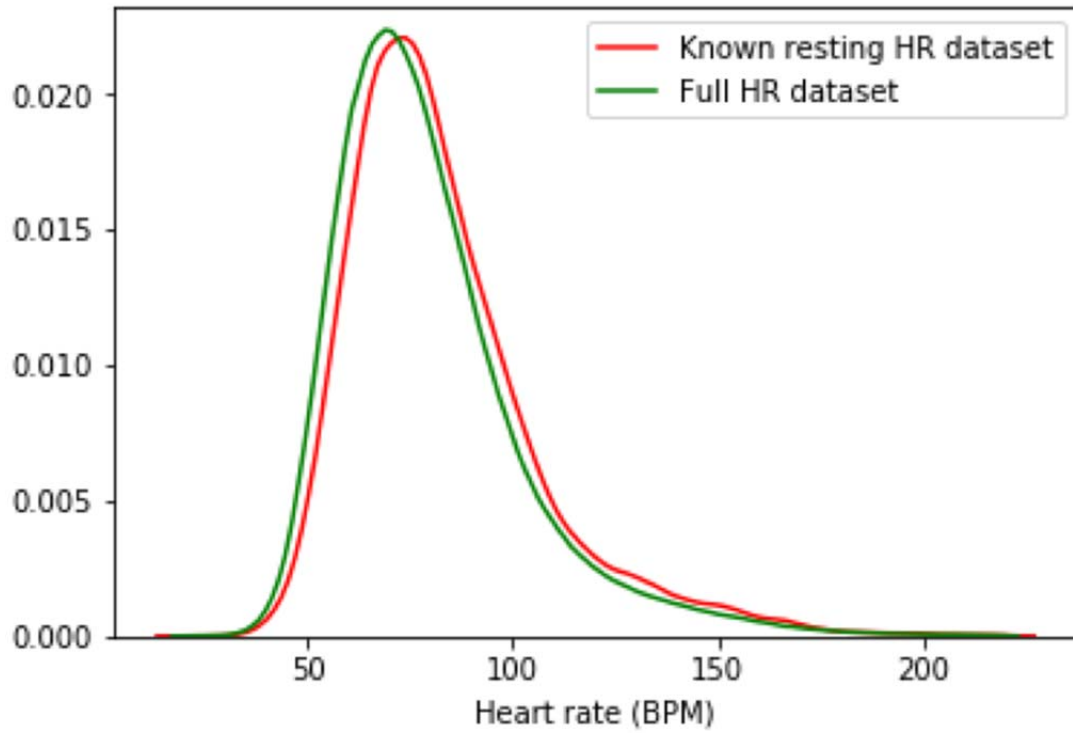

**Supplementary Figure 6. Free-living HR difference from average according to the hour of the day**

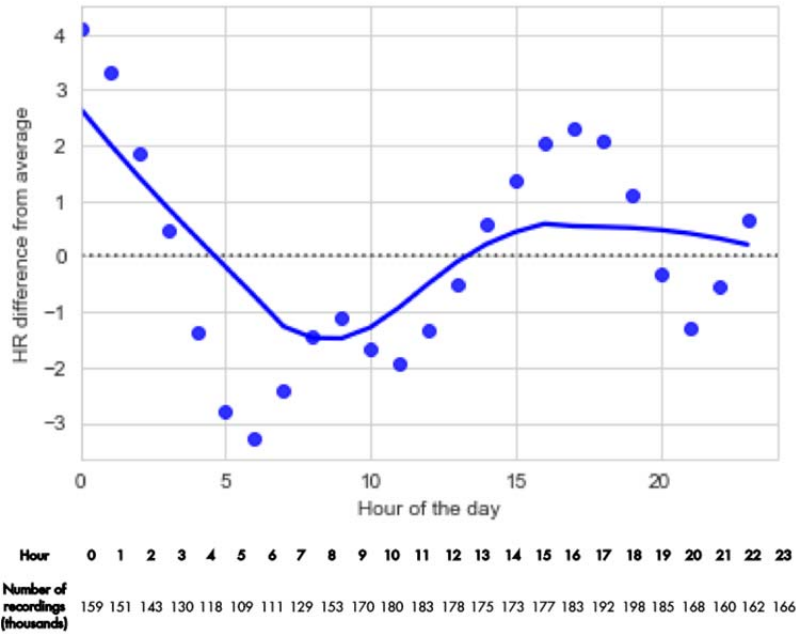

Supplement: 41746_2019_134_MOESM2_ESM.pdf [file 41746_2019_134_MOESM2_ESM.pdf]
